# Supplementary material for: Band alignment of one-dimensional transition-metal dichalcogenide heterotubes
Source: Royal Society of Chemistry journal article supplement (doi:10.1039/d4nr03384a), 2024-01-01
Supplement: d4nr03384a1.pdf [file d4nr03384a1.pdf]

## Support Information

### Band alignment of one-dimensional transition-metal dichalcogenide heterotubes

Mei Ge<sup>a</sup>, Fanmin Zeng<sup>b</sup>, Zixuan Wang<sup>b</sup>, Jiangjiang Ma<sup>b\*</sup> and Junfeng Zhang<sup>a\*</sup>

<sup>a</sup>College of Physics and Electronic Engineering, Hainan Normal University, Haikou  
571158, China

<sup>b</sup>School of Physics and Information Engineering, Shanxi Normal University, Taiyuan  
030031, China

\*Corresponding authors. E-mail address: majiangjiang@sxnu.edu.cn (J. Ma) and

zhangjf@hainnu.edu.cn (J. Zhang).

Table S1. The diameter (in the unit of Å) of both inner and outer ac MoS<sub>2</sub>@WS<sub>2</sub> and WS<sub>2</sub>@MoS<sub>2</sub> heterotubes.

| MoS <sub>2</sub> @WS <sub>2</sub> |         | WS <sub>2</sub> @MoS <sub>2</sub> |         |
|-----------------------------------|---------|-----------------------------------|---------|
| D_Inner                           | D_Outer | D_Inner                           | D_Outer |
| 14.304                            | 26.667  | 14.336                            | 26.588  |
| 15.972                            | 28.353  | 16.029                            | 28.321  |
| 17.638                            | 30.085  | 17.698                            | 30.055  |
| 19.286                            | 31.786  | 19.348                            | 31.756  |
| 21.000                            | 33.597  | 21.064                            | 33.574  |
| 22.700                            | 35.350  | 22.765                            | 35.334  |
| 24.385                            | 37.068  | 24.447                            | 37.045  |
| 26.088                            | 38.799  | 26.145                            | 38.779  |

Table S2. The diameter (in the unit of Å) of both inner and outer zz MoS<sub>2</sub>@WS<sub>2</sub> and WS<sub>2</sub>@MoS<sub>2</sub> heterotubes.

| MoS <sub>2</sub> @WS <sub>2</sub> |         | WS <sub>2</sub> @MoS <sub>2</sub> |               |
|-----------------------------------|---------|-----------------------------------|---------------|
| D_Inner                           | D_Outer | D_Inner12.264                     | D_Outer24.148 |
| 13.191                            | 25.180  | 13.231                            | 25.154        |
| 14.132                            | 26.165  | 14.169                            | 26.141        |
| 15.083                            | 27.175  | 15.133                            | 27.143        |
| 16.019                            | 28.171  | 16.088                            | 28.157        |
| 16.996                            | 29.139  | 17.029                            | 29.109        |
| 17.966                            | 30.120  | 17.992                            | 30.097        |
| 21.783                            | 34.086  | 21.862                            | 34.044        |
| 22.924                            | 35.283  | 22.975                            | 35.241        |
| 23.810                            | 36.101  | 23.835                            | 36.077        |
| 24.814                            | 37.135  | 24.842                            | 37.110        |

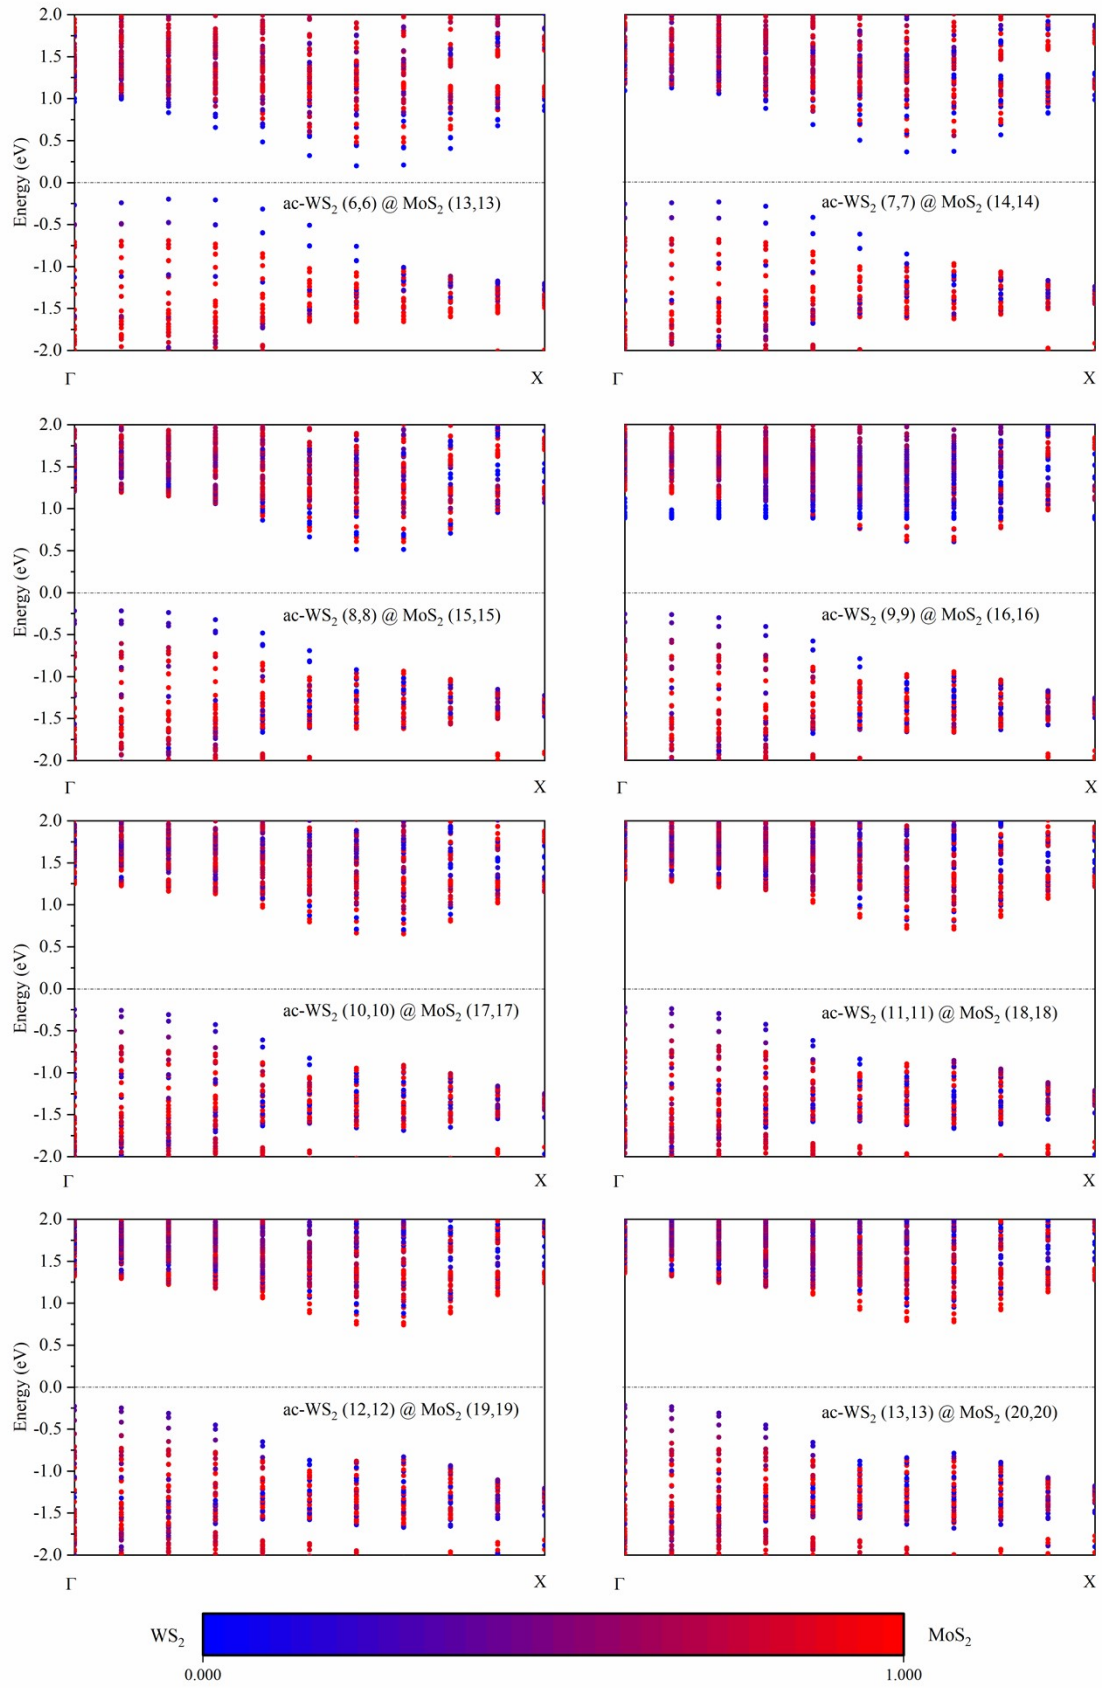

FIG. S1. Band structures of 1D AC WS<sub>2</sub>@MoS<sub>2</sub> heterotubes.

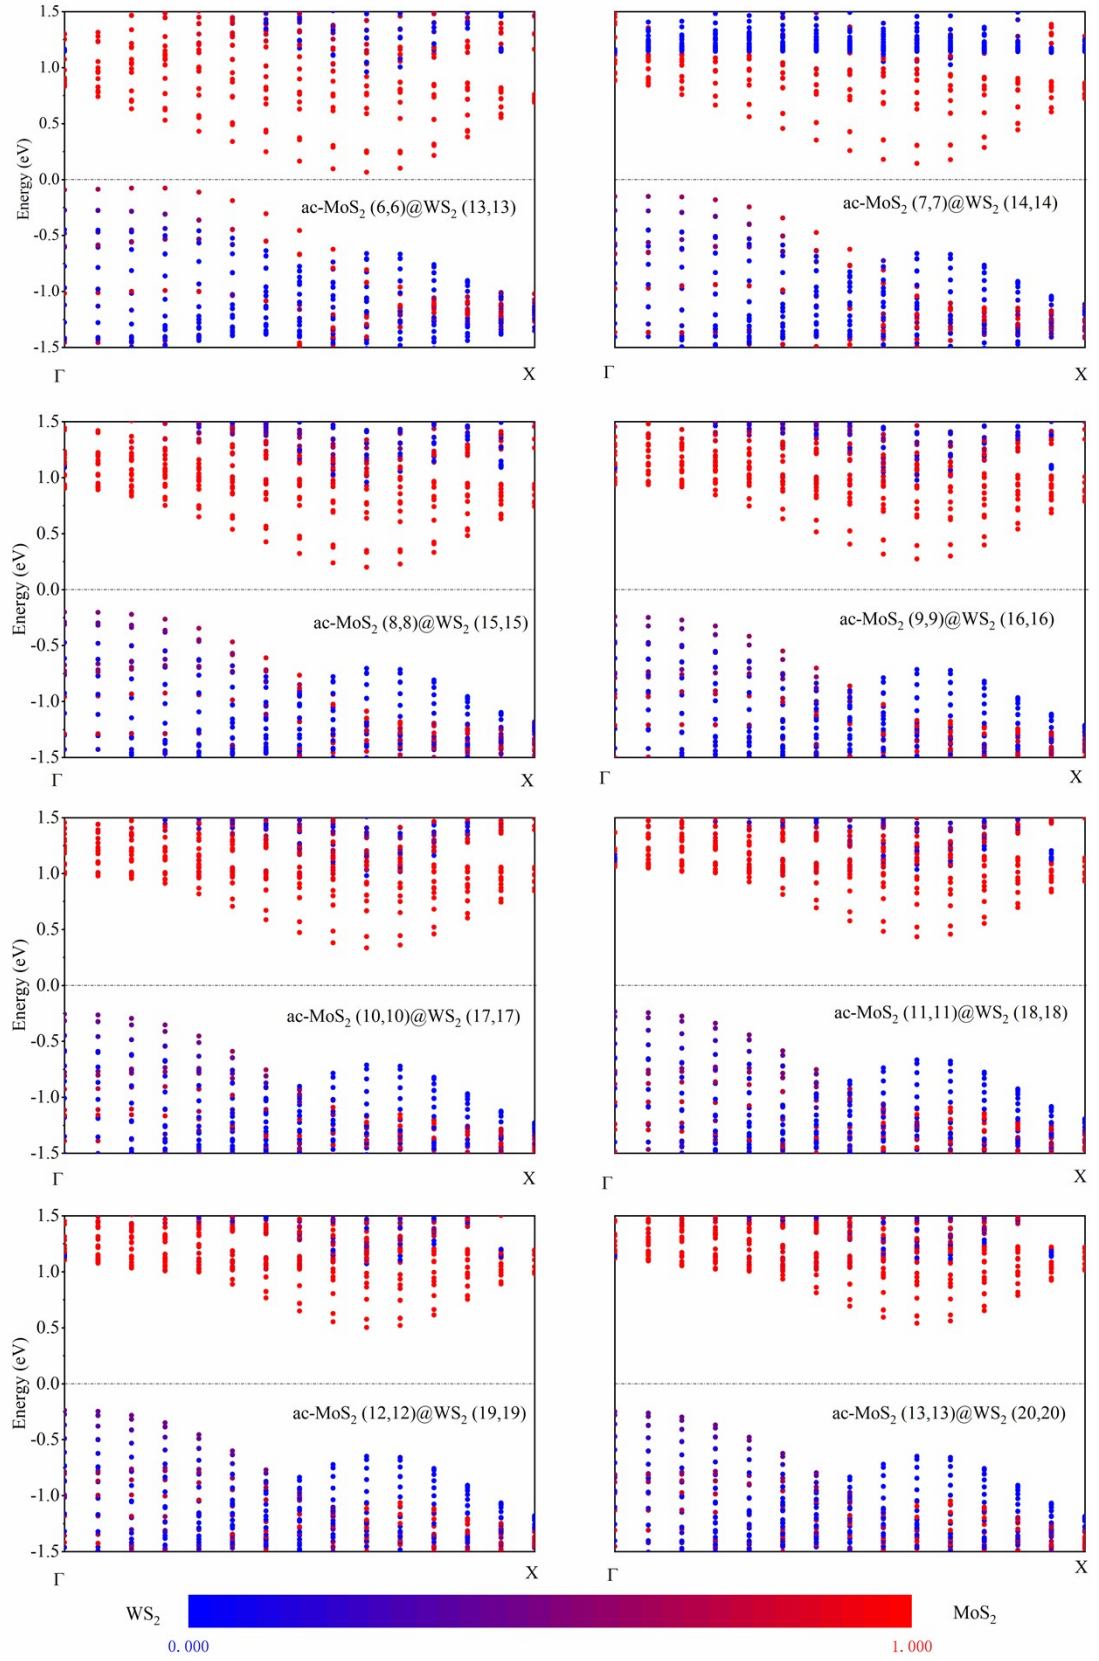

FIG. S2. Band structures of 1D AC  $\text{MoS}_2@WS_2$  heterotubes.

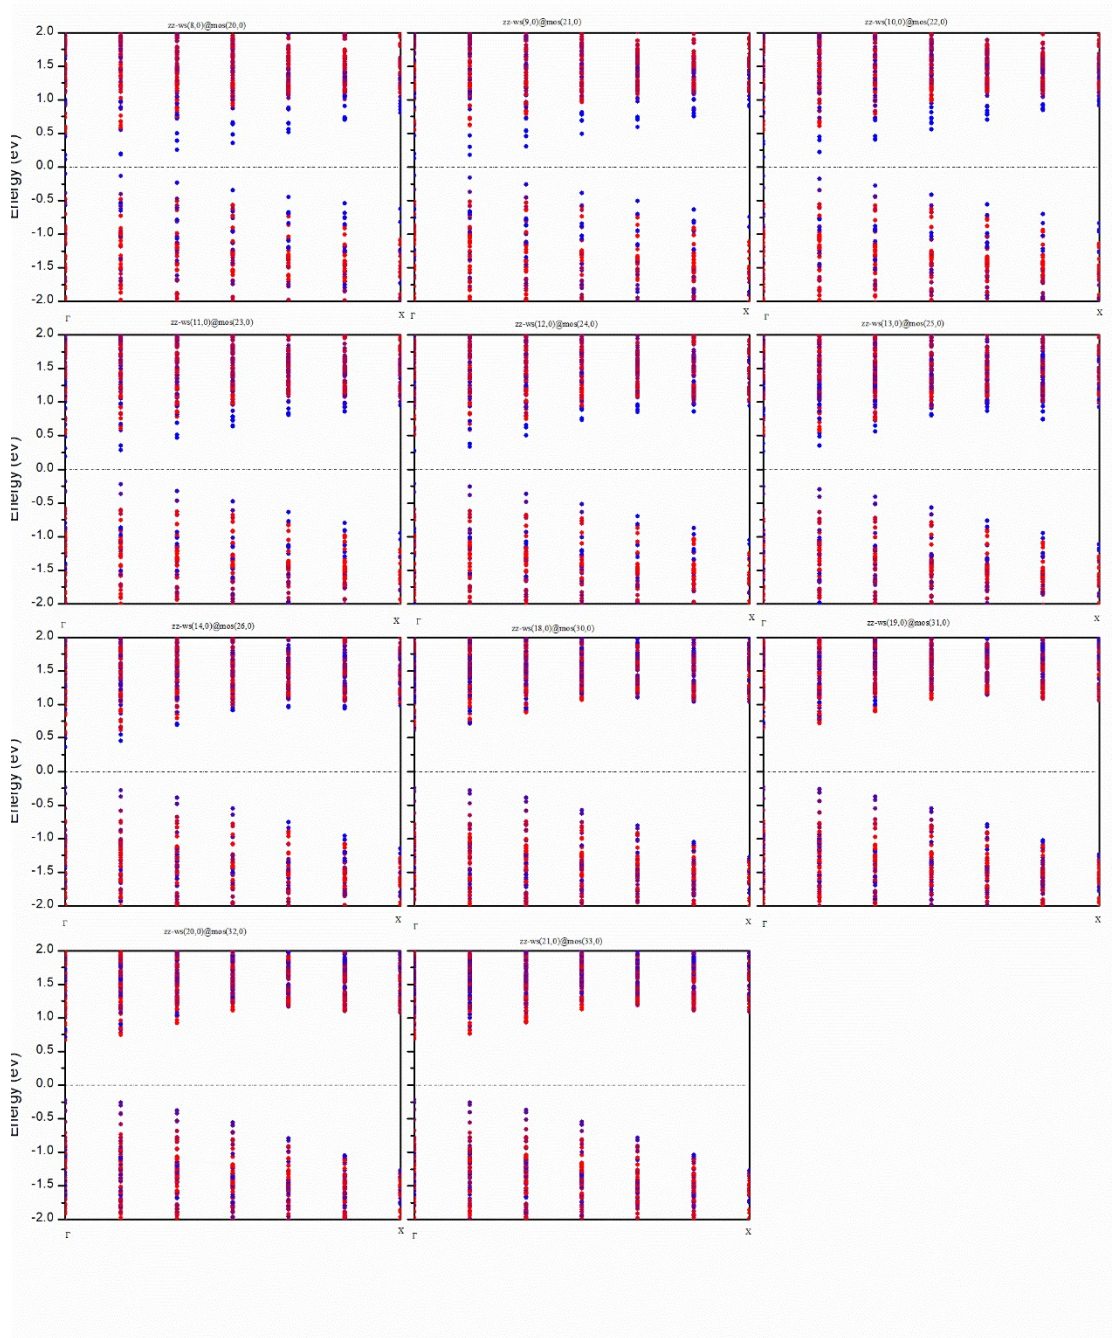

FIG. S3. Band structures of 1D ZZ WS<sub>2</sub>@MoS<sub>2</sub> heterotubes.



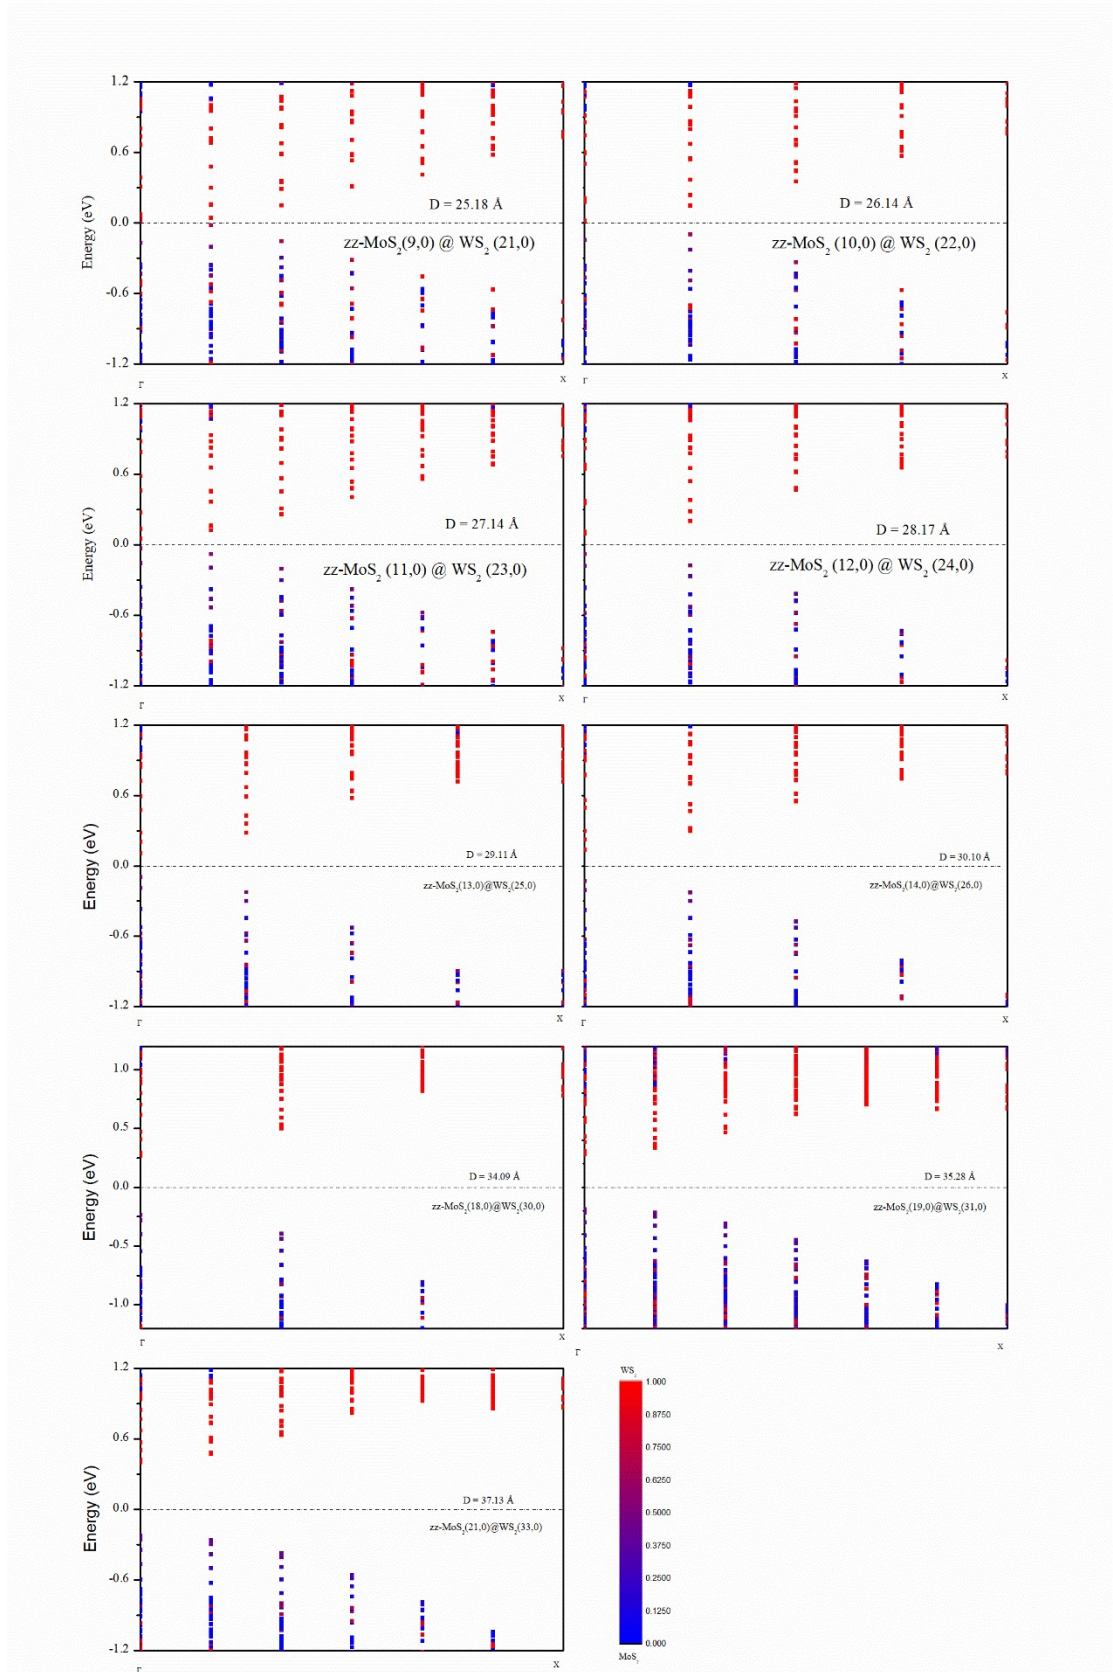

FIG. S4. Band structures of 1D ZZ  $\text{MoS}_2@WS_2$  heterotubes.

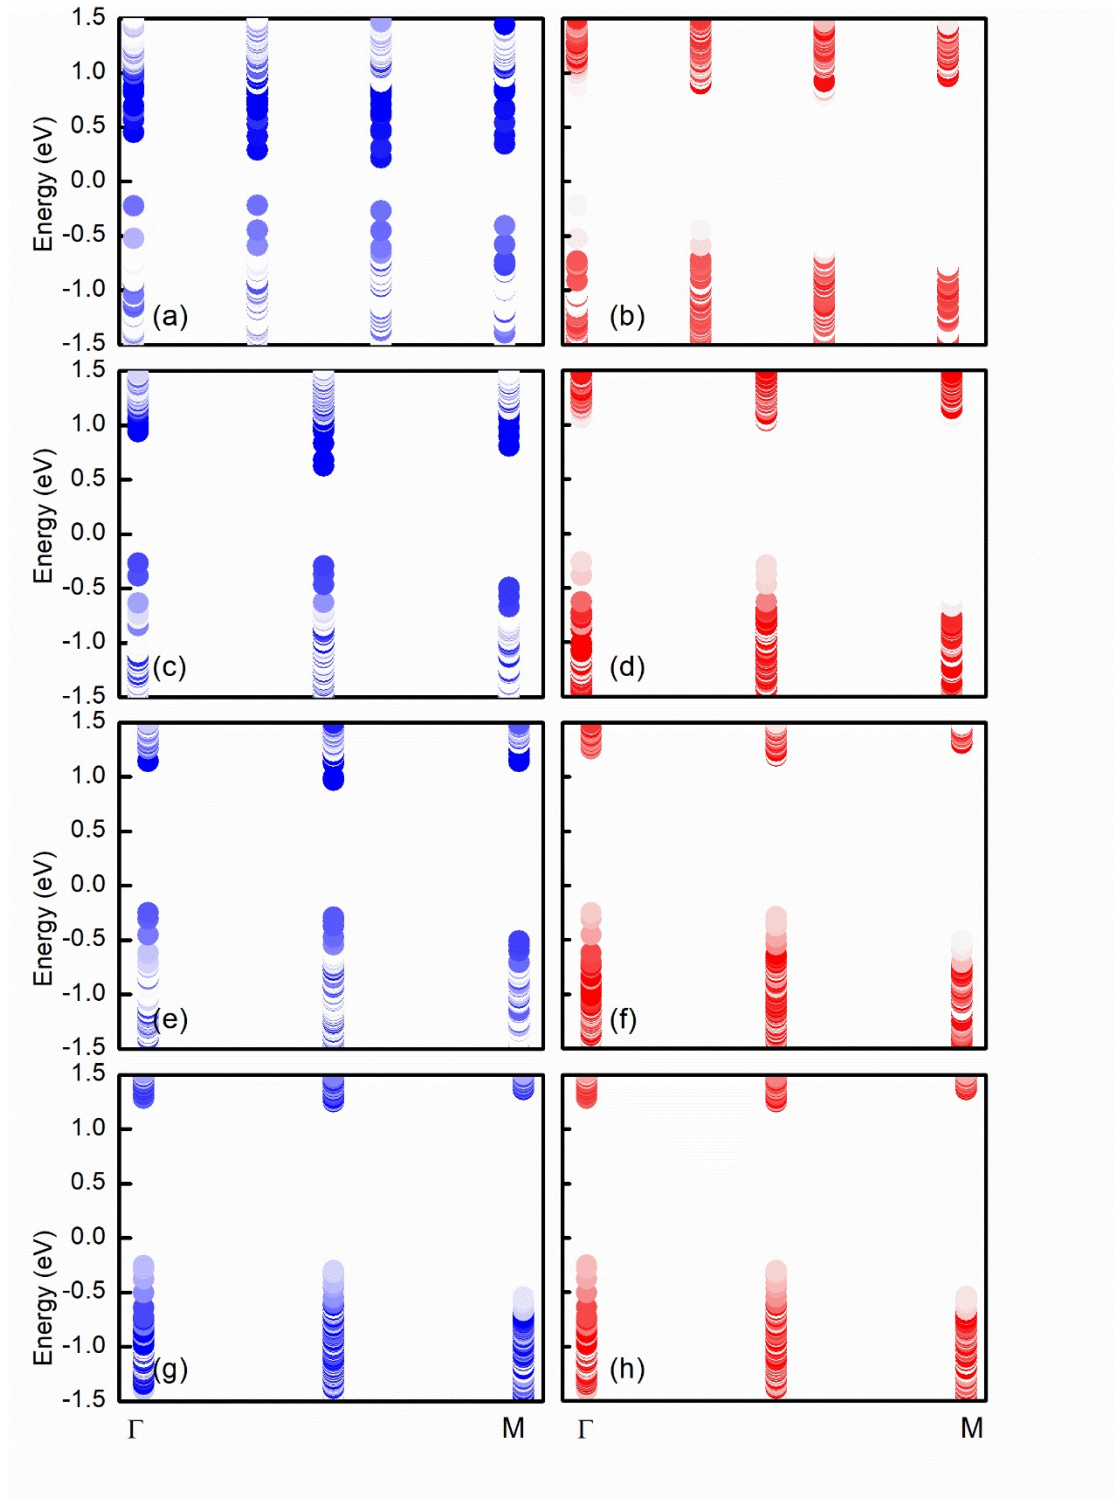

FIG. S5. Band structures of 1D chiral  $(41|41)$   $\text{WS}_2@MoS_2$  heterotubes.



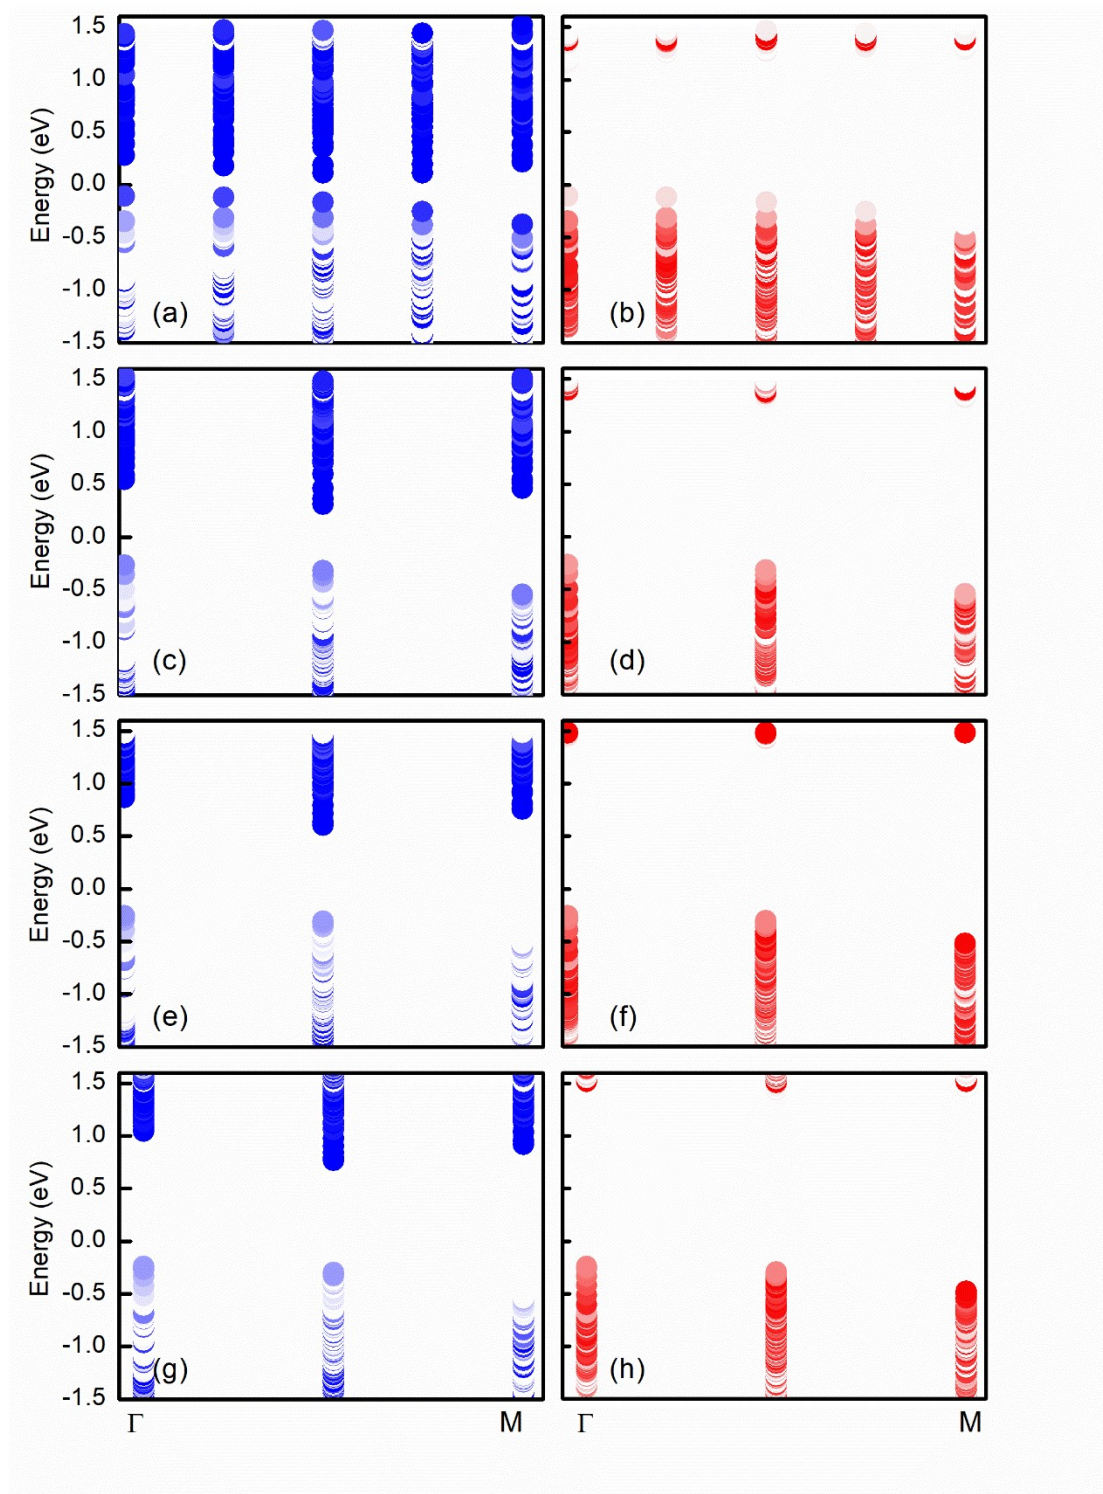

FIG. S6. Band structures of 1D chiral (41|41) MoS<sub>2</sub>@WS<sub>2</sub> heterotubes.
